# Supplementary material for: Surface modification of sewage sludge derived carbonaceous catalyst for m-cresol catalytic wet peroxide oxidation and degradation mechanism
Source: Royal Society of Chemistry journal article supplement (doi:10.1039/c5ra00858a), 2015-01-01
Supplement: c5ra00858a1.pdf [file c5ra00858a1.pdf]

## Supplementary Materials

Yang Yu<sup>a,b</sup>, Huangzhao Wei<sup>a</sup>, Li Yu<sup>a,b</sup>, Sen Wang<sup>a,b</sup>, Xuning Li<sup>a,b,c</sup>, Junhu Wang<sup>a,c</sup>, Chenglin Sun<sup>a\*</sup>

<sup>a</sup> Dalian National Laboratory for Clean Energy, Dalian Institute of Chemical Physics, Chinese Academy of Sciences, Dalian 116023, China

<sup>b</sup> University of Chinese Academy of Sciences, Beijing 100049, China

<sup>c</sup> Mössbauer Effect Data Center & Laboratory of Catalysts and New Materials for Aerospace, Dalian Institute of Chemical Physics, Chinese Academy Sciences, Dalian 116023, China

### 1. SEM and EDAX

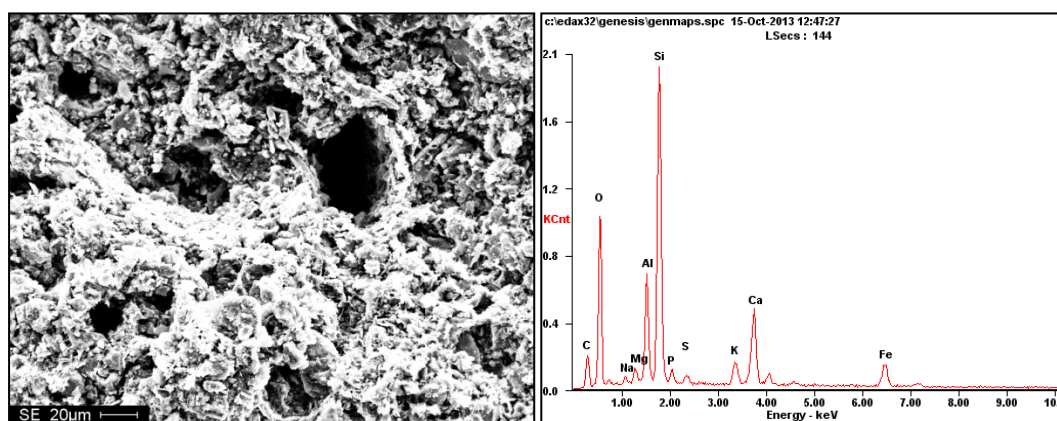

(a) SW

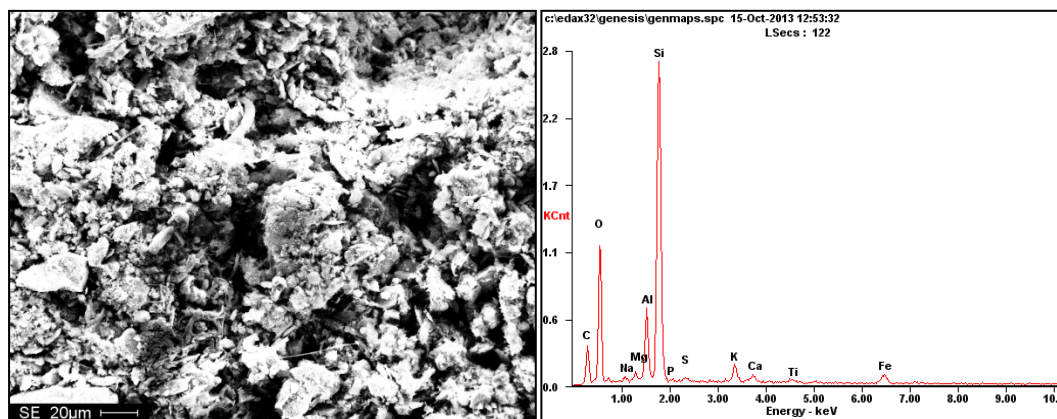

(b) HNO<sub>3</sub>-SW

Fig.S1 SEM and EDAX spectrum of SW (a) and HNO<sub>3</sub>-SW(b).

### 2. Specific surface area and pore distribution

---

\* Corresponding author at: Dalian Institute of Chemical Physics,  
Chinese Academy of Sciences, No. 457 Zhongshan Road, Dalian 116023, P.R. China.  
Tel.: +86 411 84379326; fax: +86 411 84699965.  
E-mail address: [clsun@dicp.ac.cn](mailto:clsun@dicp.ac.cn).

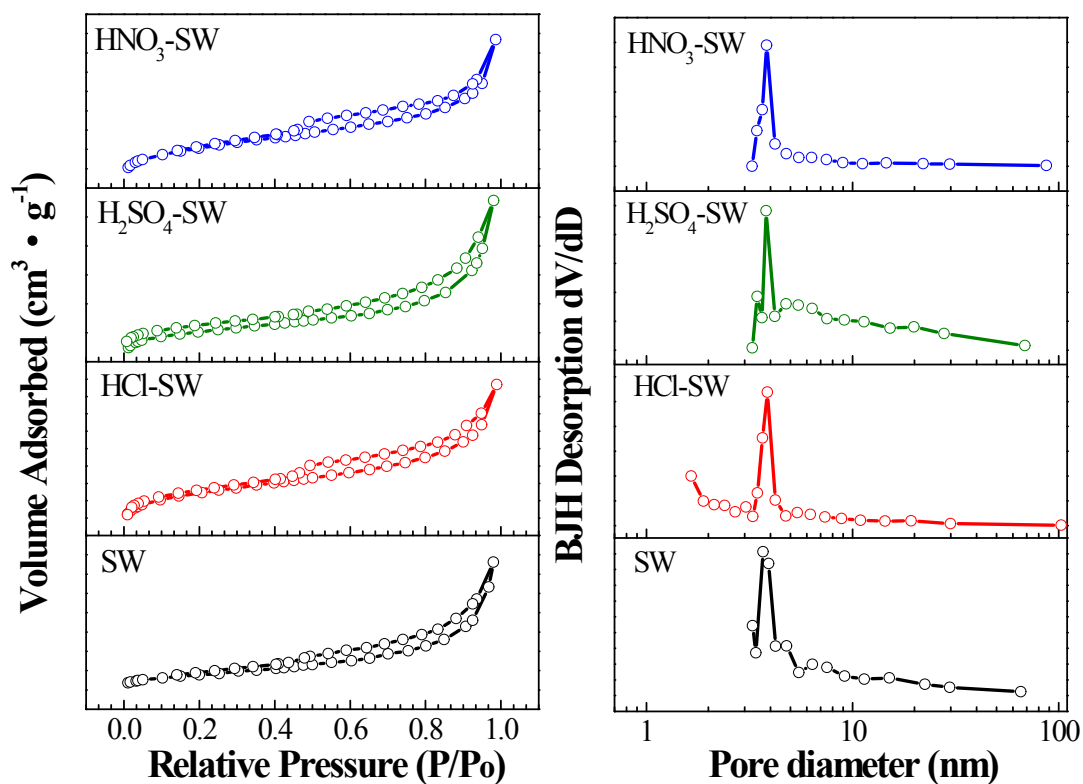

Fig.S2 Nitrogen adsorption/desorption isotherms and pore distribution of SWs.

### 3. GC/MS and HRMS

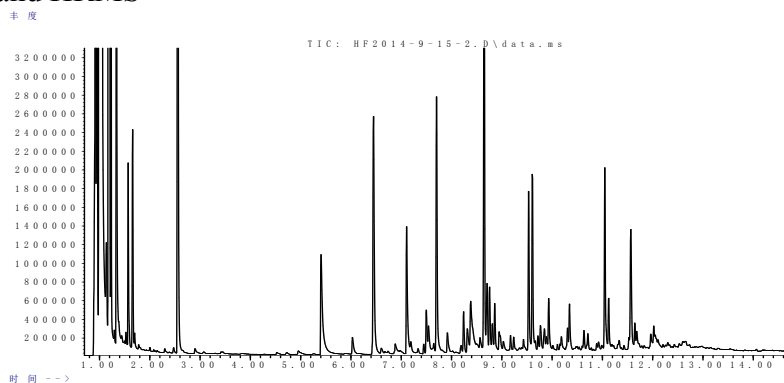

Fig.S3 GC/MS spectrum of m-cresol degradation in CWPO by HNO<sub>3</sub>-SW catalyst.

Table S1 Result of GC/MS and HRMS

| GC/MS | HRMS | Low molecular weight acids |
|-------|------|----------------------------|
|       |      | <chem>CC(=O)O</chem>       |

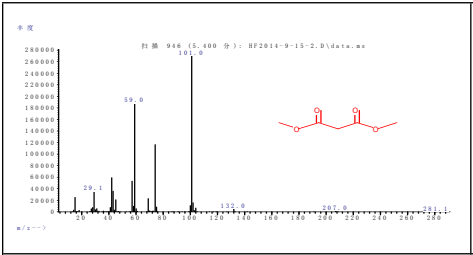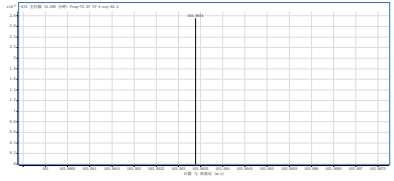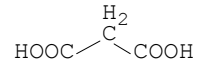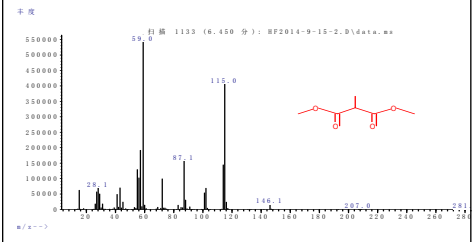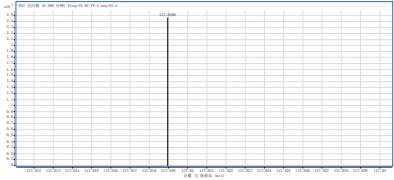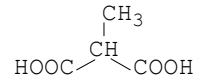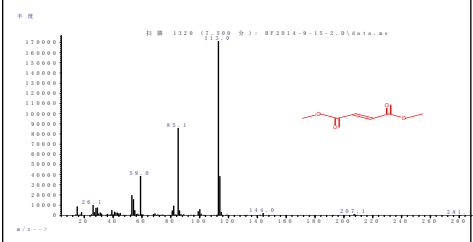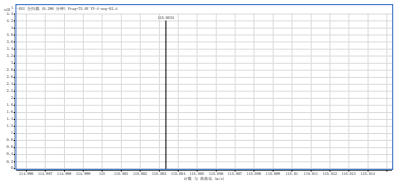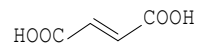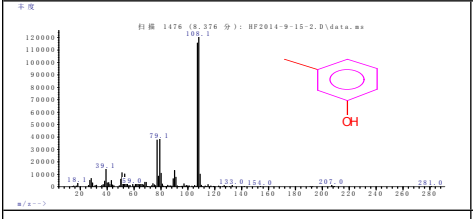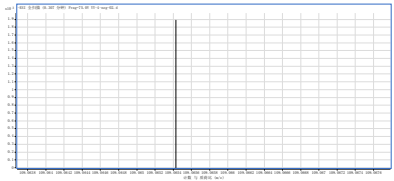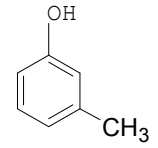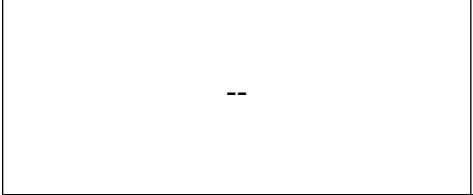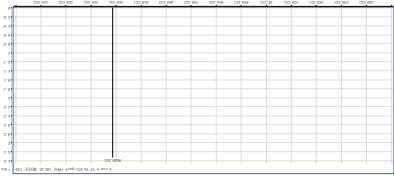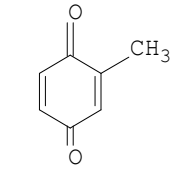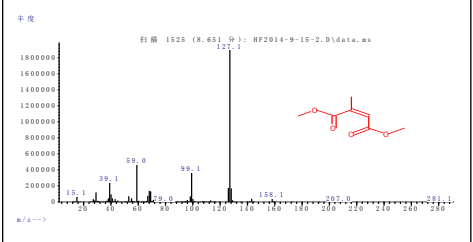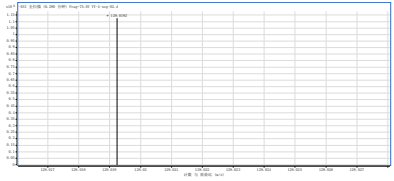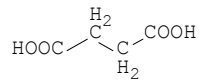

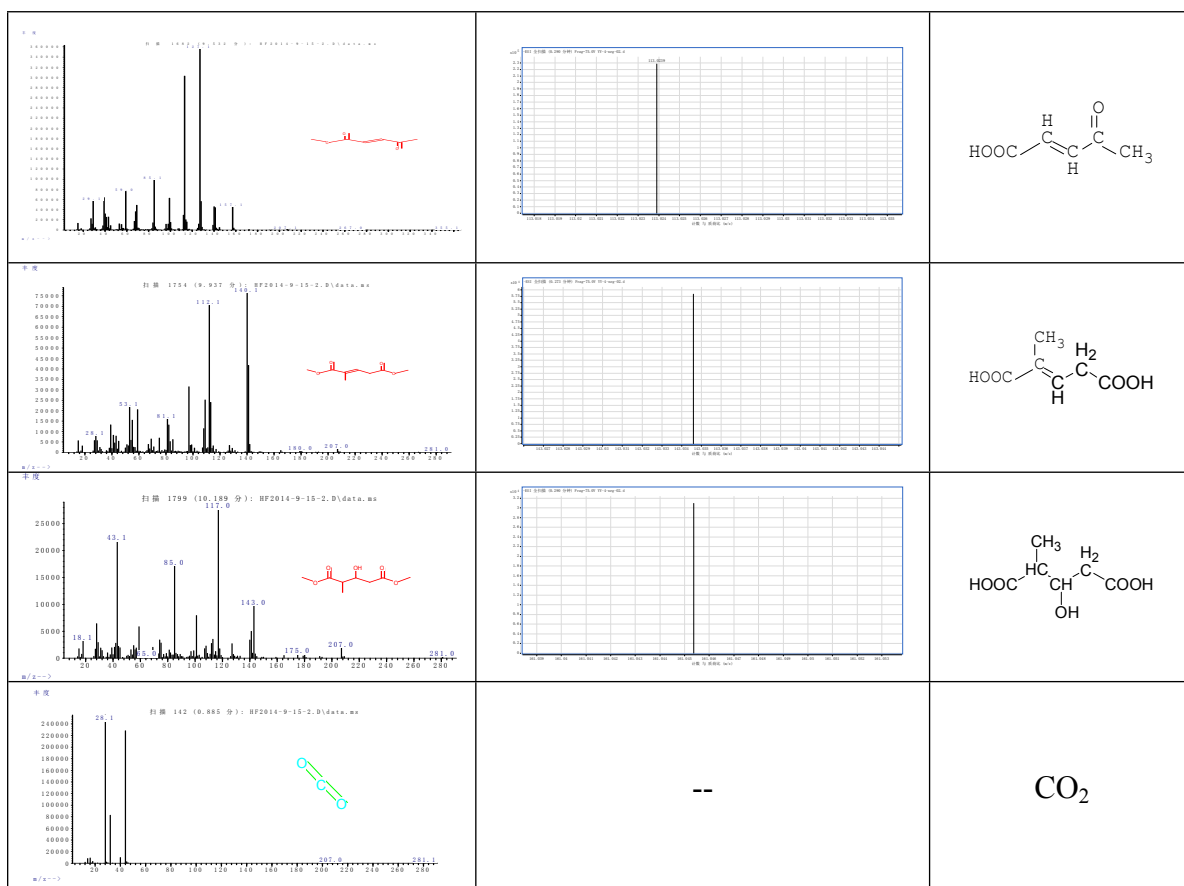

#### 4. Ion chromatogram

Ion chromatogram of the effluent by SWs was shown in Fig S4. The retention time of the peak before 3 min was monocarboxylic such as formic acid, acetic acid and propionic acid, while the retention time of the peak after 3 min was dicarboxylic acids. The result showed that more low molecular weight acids were generated by HNO<sub>3</sub>-SW catalyst. It indicated that the catalytic activity of HNO<sub>3</sub>-SW was better than SW.

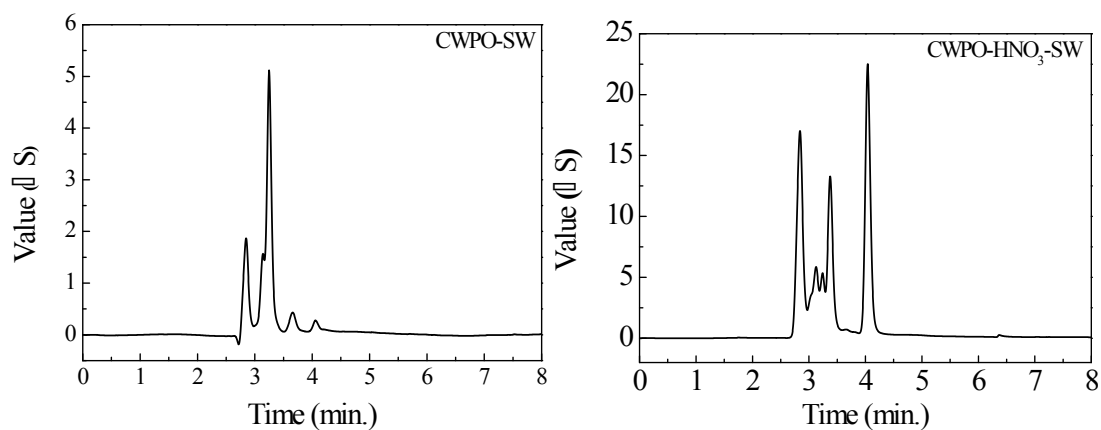

Fig.S4. Total ion chromatogram of the effluent by different SW catalysts: SW (a) and HNO<sub>3</sub>-SW (b).

#### 5. XRF

Table S2. XRF analysis of the four SW catalysts.

| Chemical composition           | SW    | HCl-SW | H <sub>2</sub> SO <sub>4</sub> -SW | HNO <sub>3</sub> -SW |
|--------------------------------|-------|--------|------------------------------------|----------------------|
| C                              | 13.80 | 10.33  | 16.22                              | 12.29                |
| SiO <sub>2</sub>               | 46.32 | 63.91  | 51.81                              | 63.26                |
| Al <sub>2</sub> O <sub>3</sub> | 15.23 | 15.49  | 17.55                              | 14.61                |
| CaO                            | 9.69  | 0.55   | 1.89                               | 1.04                 |
| Fe <sub>2</sub> O <sub>3</sub> | 5.06  | 1.68   | 3.92                               | 2.39                 |
| K <sub>2</sub> O               | 1.80  | 2.21   | 1.99                               | 1.98                 |
| P <sub>2</sub> O <sub>5</sub>  | 2.06  | 0.35   | 1.73                               | 0.35                 |

### 6. Continuous adsorption experiment

The continuous adsorption experiment was carried out by HNO<sub>3</sub>-SW catalyst without the addition of any hydrogen peroxide. The results were shown in Fig. S6. It took 29 hours to reach the adsorption equilibrium.

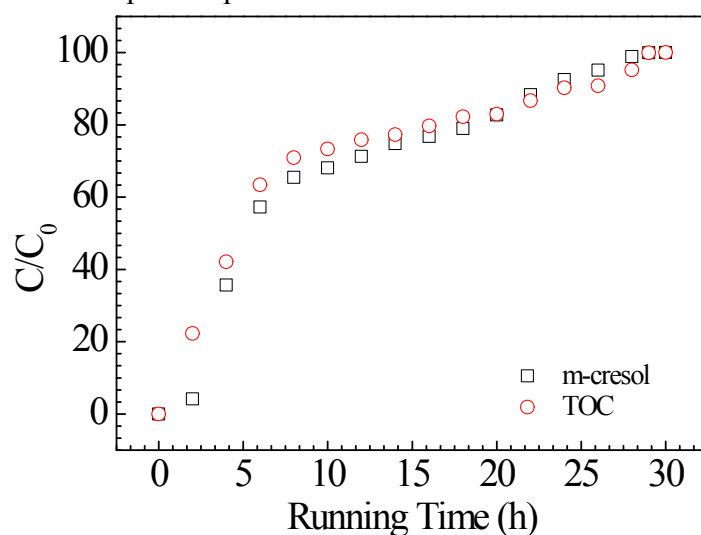Fig.S6. Continuous adsorption experiment by HNO<sub>3</sub>-SW.

### 7. BET

Table S3. BET surface area of SW catalysts

| Catalysts                          | S <sub>BET</sub> (N <sub>2</sub> ) | Total pore volume                | Average pore diameter |
|------------------------------------|------------------------------------|----------------------------------|-----------------------|
|                                    | m <sup>2</sup> ·g <sup>-1</sup>    | cm <sup>3</sup> ·g <sup>-1</sup> | nm                    |
| SW                                 | 22.34                              | 0.051                            | 3.882                 |
| HCl-SW                             | 80.74                              | 0.083                            | 3.860                 |
| H <sub>2</sub> SO <sub>4</sub> -SW | 33.42                              | 0.051                            | 3.810                 |
| HNO <sub>3</sub> -SW               | 52.94                              | 0.049                            | 3.826                 |
